# Supplementary material
Source: Springer Nature journal article supplement (https://www.springermedizin.de/resource/supplementary/12872_2013_692_MOESM3_ESM.pdf/9430686)

GP

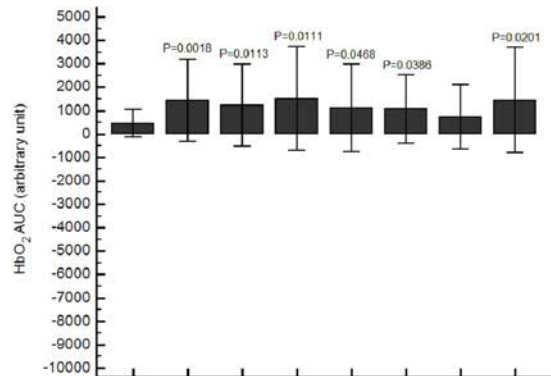

SFC

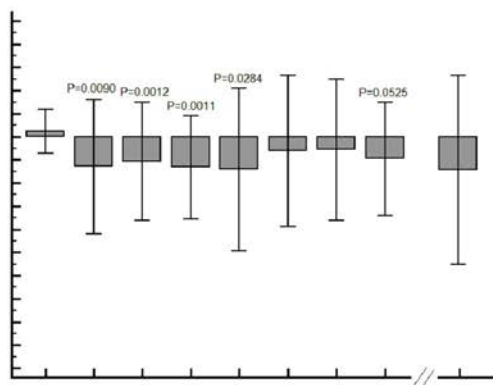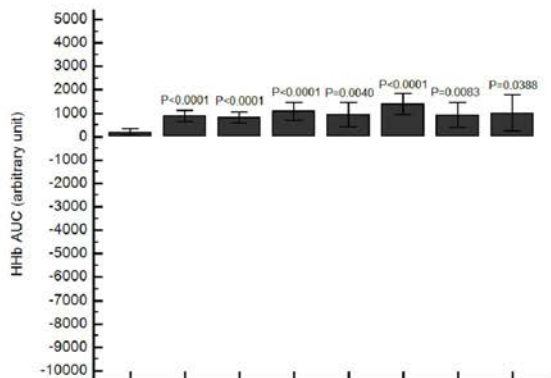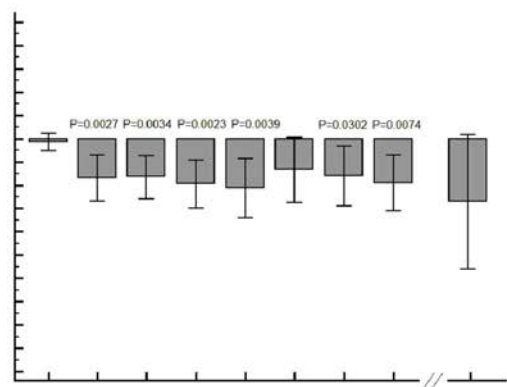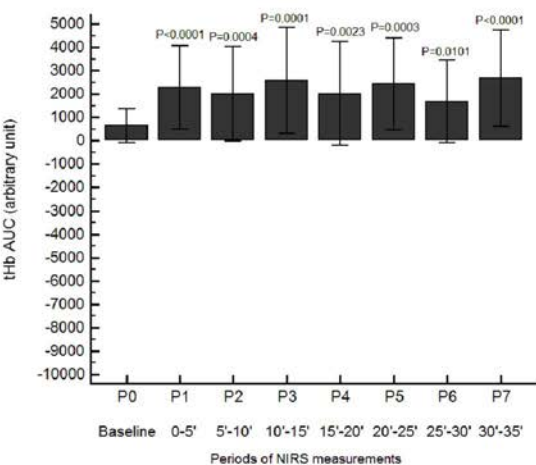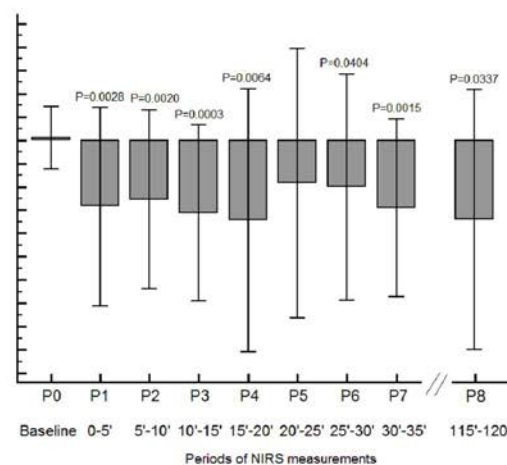

Supplement: MOESM3 [file 9430686]
